# Supplementary material for: Early consensus management for non-ICU acute respiratory failure SARS-CoV-2 emergency in Italy: from ward to trenches
Source: PubMed Central journal article supplement — Eur Respir J. 2020 May 21;55(5):2000632. doi: 10.1183/13993003.00632-2020 (PMC7144262; doi:10.1183/13993003.00632-2020), 2020-05-21
Supplement: ERJ-00632-2020.Shareable.pdf [file ERJ-00632-2020.Shareable.pdf]

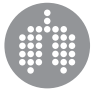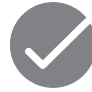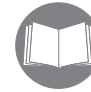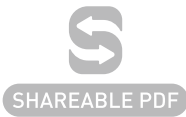

# Early consensus management for non-ICU acute respiratory failure SARS-CoV-2 emergency in Italy: from ward to trenches

Michele Vitacca <sup>1</sup>, Stefano Nava<sup>2,3</sup>, Pierachille Santus<sup>4</sup> and Sergio Harari <sup>5</sup>

**Affiliations:** <sup>1</sup>ICS Maugeri IRCCS, Respiratory Rehabilitation Unit Lumezzane, Brescia, Italy. <sup>2</sup>Alma Mater Studiorum University of Bologna, Dept of Clinical, Integrated and Experimental Medicine (DIMES), Bologna, Italy. <sup>3</sup>Respiratory and Critical Care, Sant'Orsola Malpighi Hospital, Bologna, Italy. <sup>4</sup>Dept of Biomedical and Clinical Sciences "L. Sacco", Università degli Studi di Milano. Division of Respiratory Diseases, L. Sacco University Hospital – ASST Fatebenefratelli Sacco, Milan, Italy. <sup>5</sup>Dept of Medical Sciences, San Giuseppe Hospital MultiMedica IRCCS, and Department of Clinical Sciences and Community Health, Università degli Studi di Milano, Milan, Italy.

**Correspondence:** Sergio Harari, Dept of Medical Sciences, San Giuseppe Hospital MultiMedica IRCCS, and Department of Clinical Sciences and Community Health, Università degli Studi di Milano, Via San, Vittore 12, 20123 Milan, Italy. E-mail: sergio@sergioharari.it

@ERSpublications

**The development, as soon as possible, of a European respiratory specialist network is mandatory to manage the unexpected emergency of SARS-CoV-2; the ERS has a key role to play in urgently providing recommendations, guidelines, support and information** <https://bit.ly/39OaH00>

**Cite this article as:** Vitacca M, Nava S, Santus P, *et al.* Early consensus management for non-ICU acute respiratory failure SARS-CoV-2 emergency in Italy: from ward to trenches. *Eur Respir J* 2020; 55: 2000632 [<https://doi.org/10.1183/13993003.00632-2020>].

This single-page version can be shared freely online.

The number of people infected with severe acute respiratory syndrome coronavirus 2 (SARS-CoV-2) is increasing dramatically throughout the world [1], and in Italy [2, 3], particularly in the northern region of Lombardy [4]. Regional Italian medical and political authorities have implemented extraordinary measures to contain the spread of the virus. This disease can cause massive diffuse alveolar damage resulting in acute respiratory failure (ARF), which requires, in a high percentage of cases, mechanical ventilation [5–8]. Based on our general experience so far in dealing with the disease and on the existing knowledge (albeit still limited and evolving) [5–8], Italian respiratory scientific societies herein propose early consensus statement management for non-intensive care unit (ICU) ARF SARS-CoV-2 emergencies. The consensus statement represents the expert opinion of pulmonologists directly involved in the first line of assistance, and has identified two urgent areas of action: management and organisation.
